# Supplementary material
Source: PubMed Central journal article supplement (PMC3407813)

## SUPPORTING INFORMATION

### Bicyclic C<sub>21</sub> Terpenoids from the Marine Sponge *Clathria compressa*

Prasoon Gupta, Upasana Sharma, Thomas C. Schulz, Amanda B. McLean, Allan J. Robins, and Lyndon M. West\*

#### Table of Contents:

- S2: <sup>1</sup>H NMR Spectrum of Clathric Acid (**1**) (CD<sub>3</sub>OD, 500 MHz)
- S3: <sup>13</sup>C NMR Spectrum of Clathric Acid (**1**) (CD<sub>3</sub>OD, 125 MHz)
- S4: gCOSY NMR Spectrum Clathric Acid (**1**) (CD<sub>3</sub>OD, 500 MHz)
- S5: gHSQC NMR Spectrum of Clathric Acid (**1**) (CD<sub>3</sub>OD, 500 MHz)
- S6: gHMBC NMR Spectrum of Clathric Acid (**1**) (CD<sub>3</sub>OD, 500 MHz)
- S7: ROESY NMR Spectrum of Clathric Acid (**1**) (CD<sub>3</sub>OD, 500 MHz)
- S8: <sup>1</sup>H NMR Spectrum of Clathric Acid Methyl Ester (**1a**) (CDCl<sub>3</sub>, 500 MHz)
- S9: gCOSY NMR Spectrum of Clathric Acid Methyl Ester (**1a**) (CDCl<sub>3</sub>, 500 MHz)
- S10: <sup>1</sup>H NMR spectrum of Clathrimide A (**2**) (CD<sub>3</sub>OD, 400 MHz)
- S11: <sup>13</sup>C NMR spectrum of Clathrimide A (**2**) (CD<sub>3</sub>OD, 100 MHz)
- S12: gCOSY NMR spectrum Clathrimide A (**2**) (CD<sub>3</sub>OD, 400 MHz)
- S13: gHSQC NMR spectrum of Clathrimide A (**2**) (CD<sub>3</sub>OD, 400 MHz)
- S14: gHMBC NMR spectrum of Clathrimide A (**2**) (CD<sub>3</sub>OD, 400 MHz)
- S15: ROESY NMR Spectrum of Clathrimide A (**2**) (CD<sub>3</sub>OD, 400 MHz)
- S16: <sup>1</sup>H NMR spectrum of Clathrimide B (**3**) (CD<sub>3</sub>OD, 400 MHz)
- S17: <sup>13</sup>C NMR spectrum of Clathrimide B (**3**) (CD<sub>3</sub>OD, 100 MHz)
- S18: gCOSY NMR spectrum Clathrimide B (**3**) (CD<sub>3</sub>OD, 400 MHz)
- S19: gHMBC NMR spectrum of Clathrimide B (**3**) (CD<sub>3</sub>OD, 400 MHz)
- S20: ROESY NMR Spectrum of Clathrimide B (**3**) (CD<sub>3</sub>OD, 400 MHz)

$^1\text{H}$  NMR Spectrum of Clathric Acid (**1**) ( $\text{CD}_3\text{OD}$ , 500 MHz)

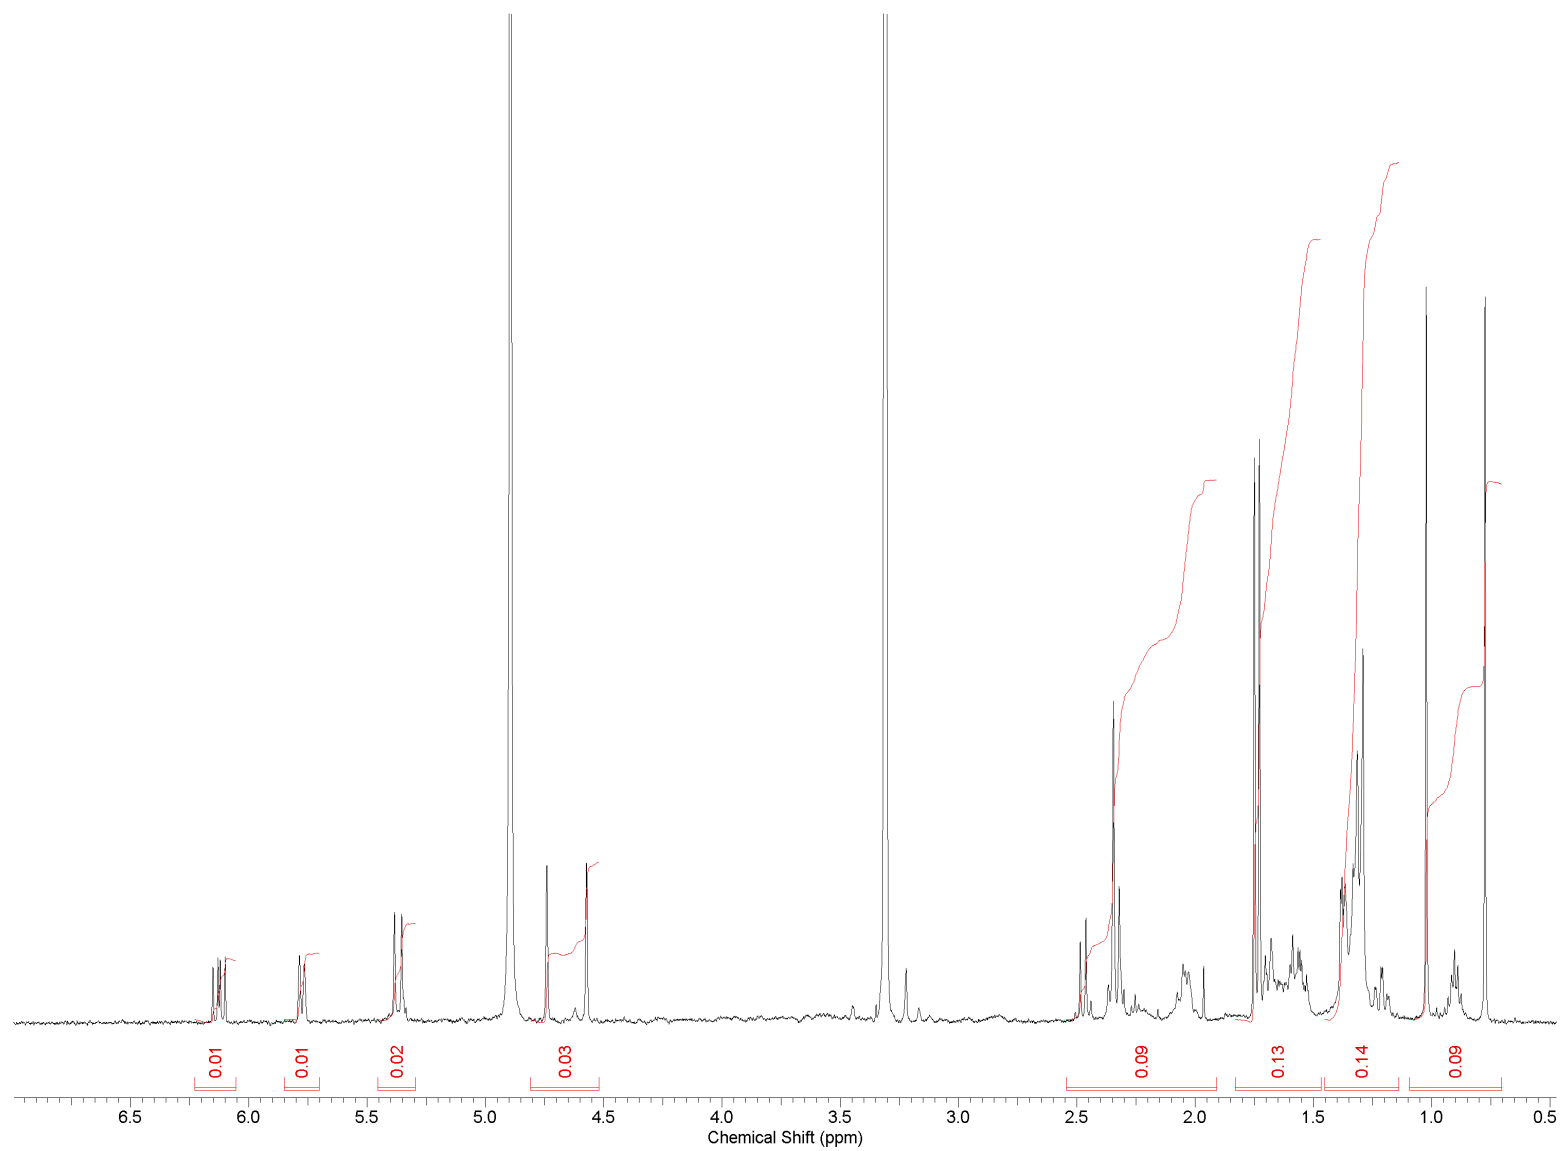

<sup>13</sup>C NMR Spectrum of Clathric Acid (1) (CD<sub>3</sub>OD, 125 MHz)

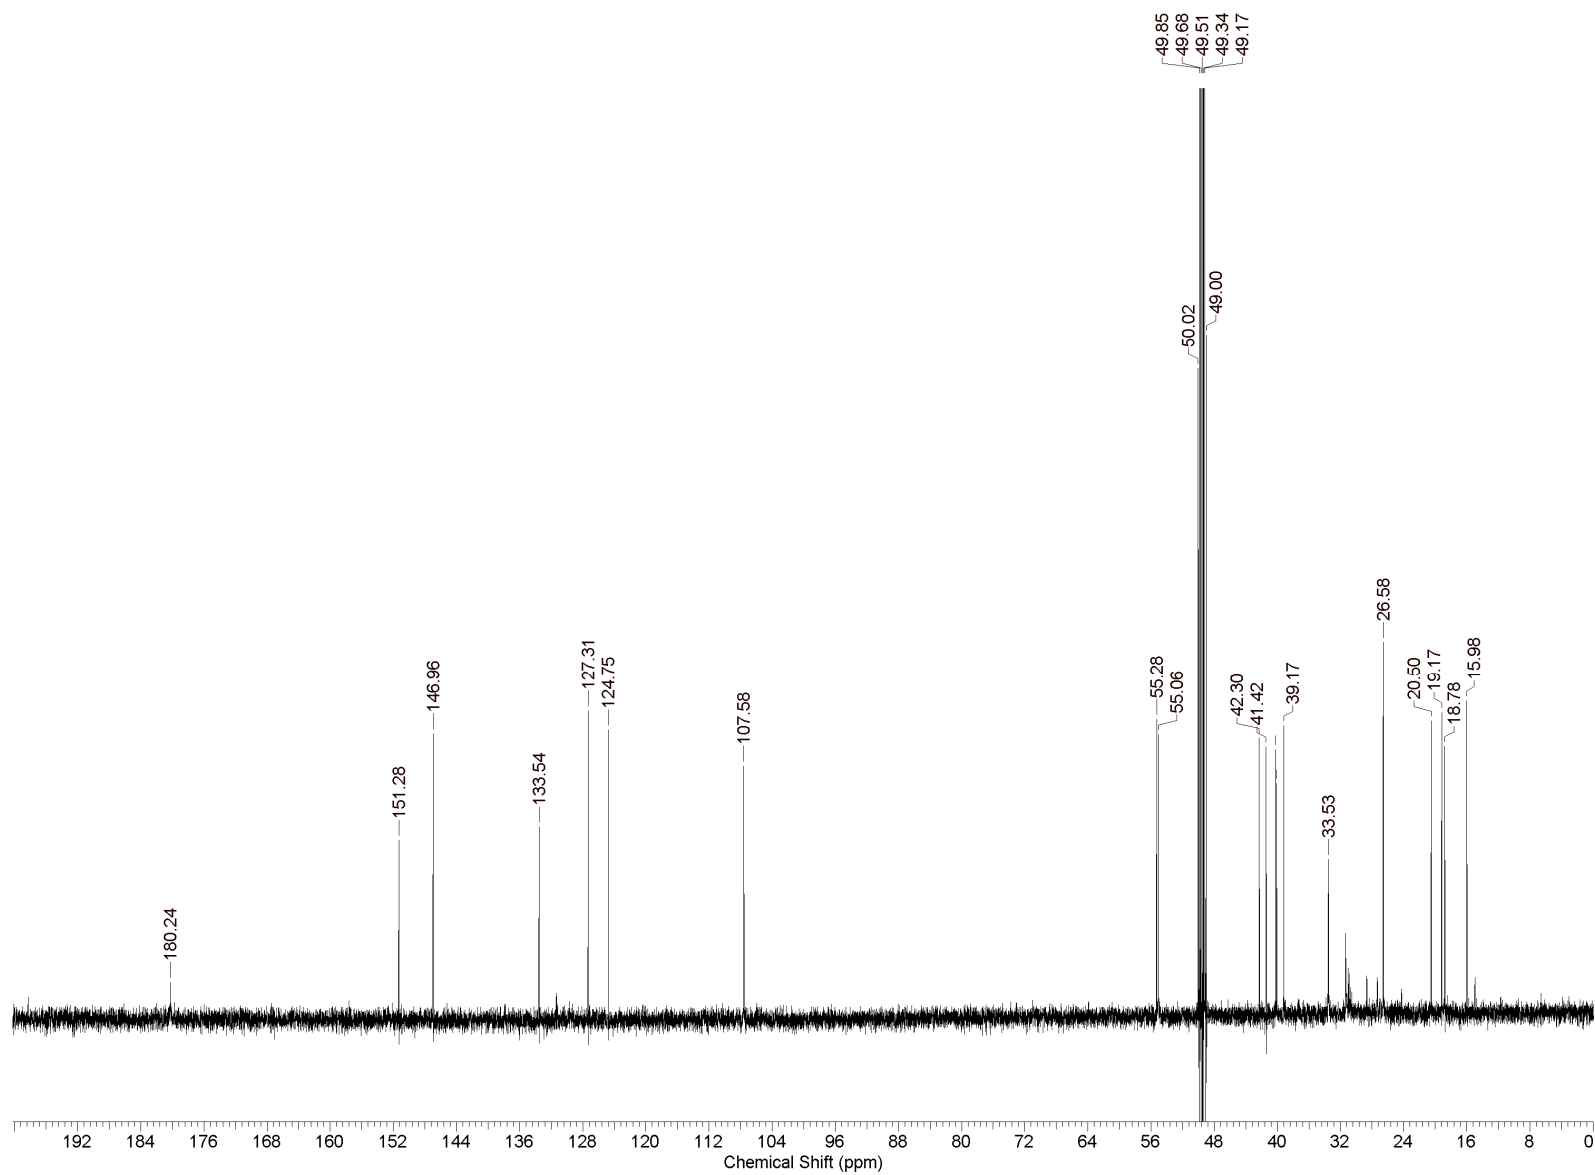

gCOSY NMR Spectrum of Clathric Acid (1) (CD<sub>3</sub>OD, 500 MHz)

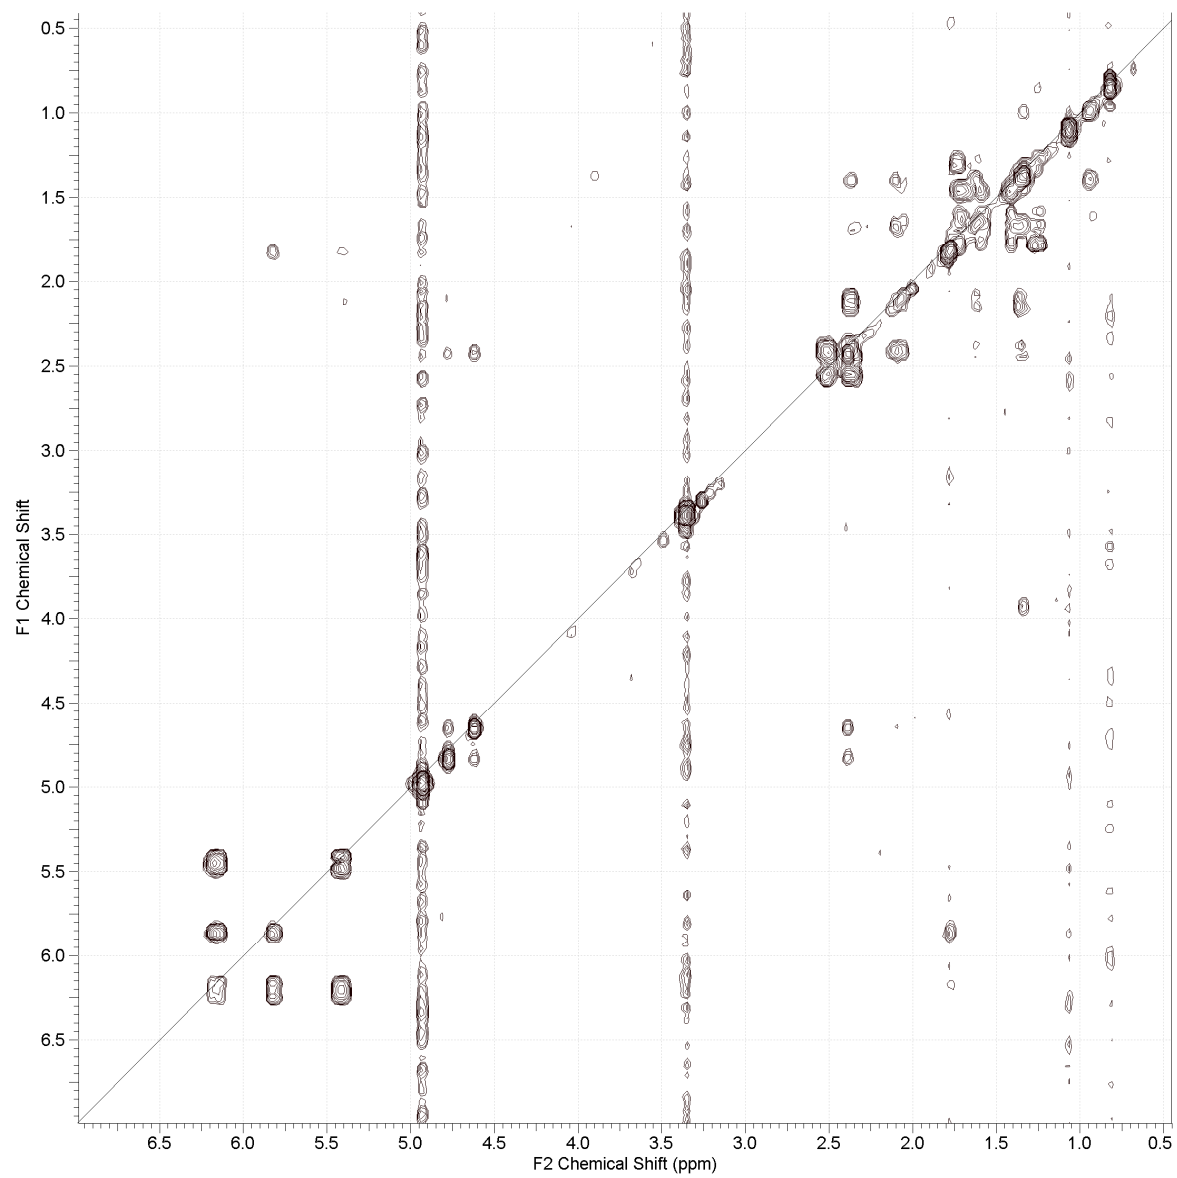

gHSQC NMR Spectrum of Clathric Acid (1) (CD<sub>3</sub>OD, 500 MHz)

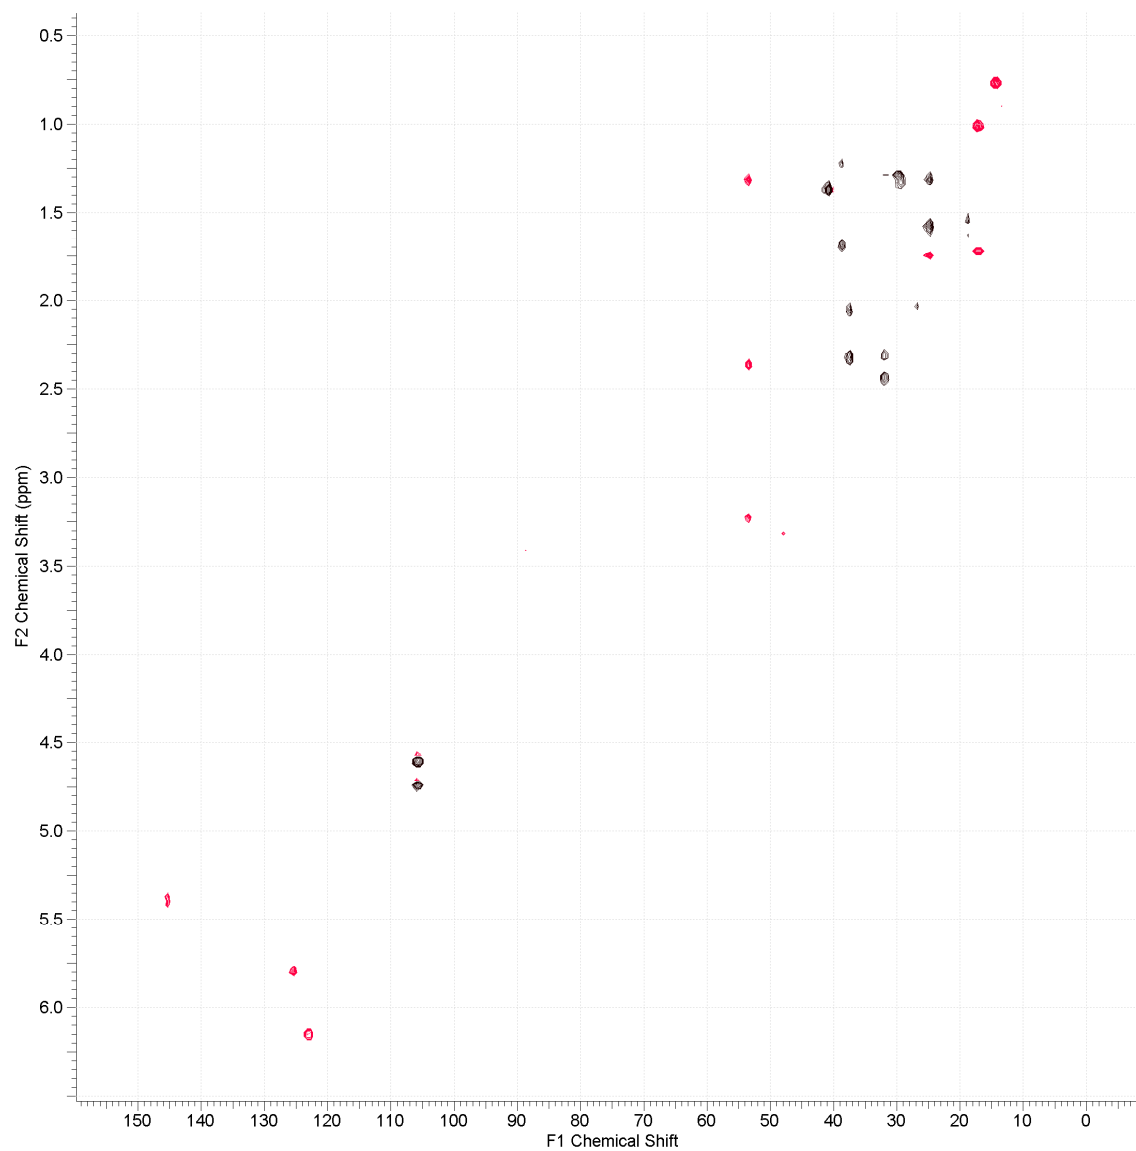

gHMBC NMR Spectrum of Clathric Acid (1) (CD<sub>3</sub>OD, 500 MHz)

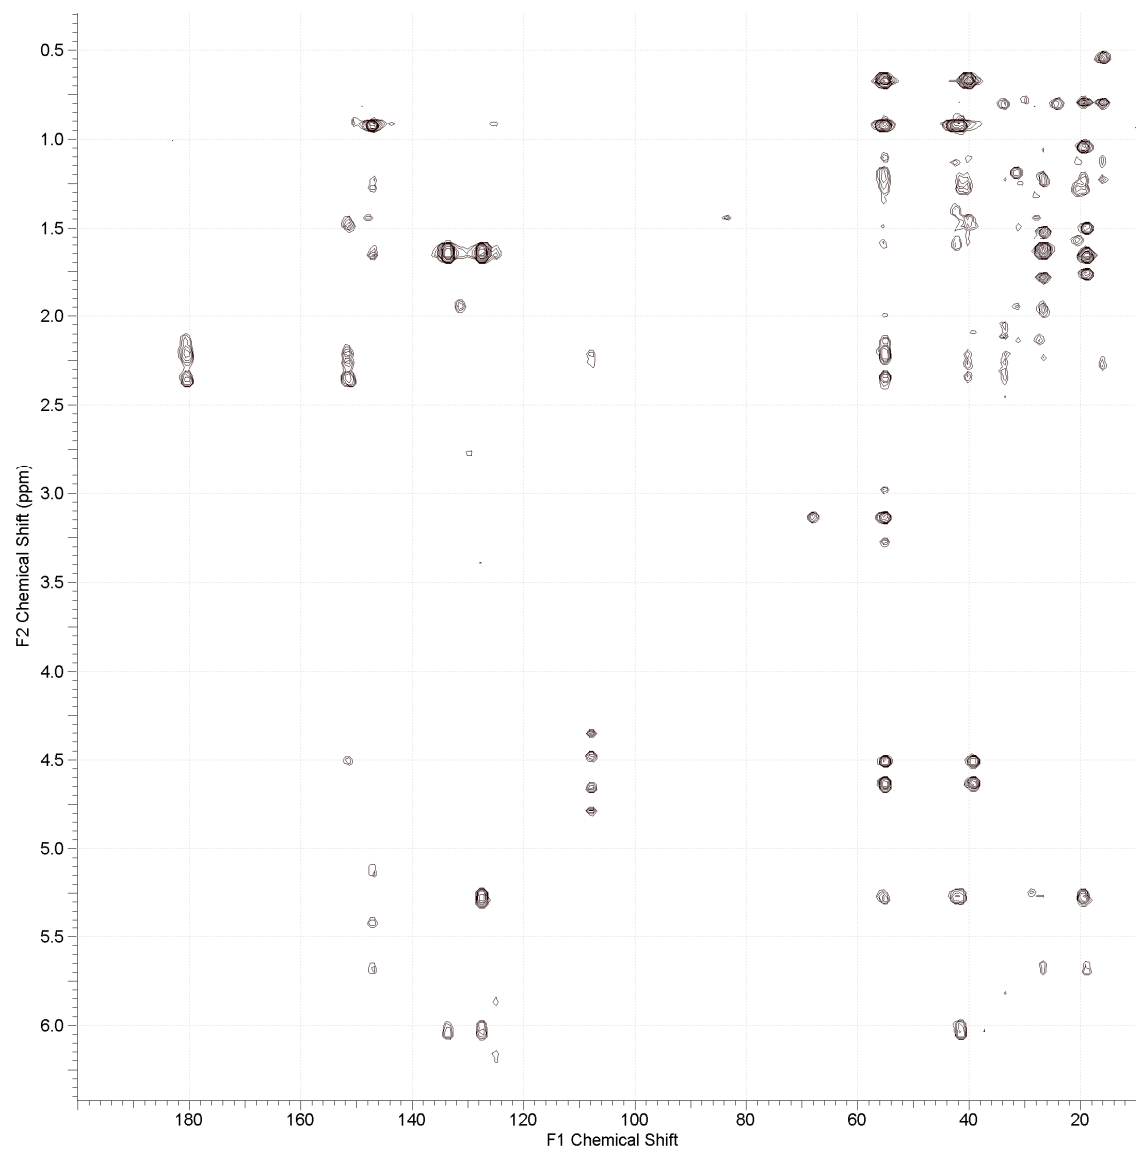

ROESY NMR Spectrum of Clathric Acid (**1**) (CD<sub>3</sub>OD, 500 MHz)

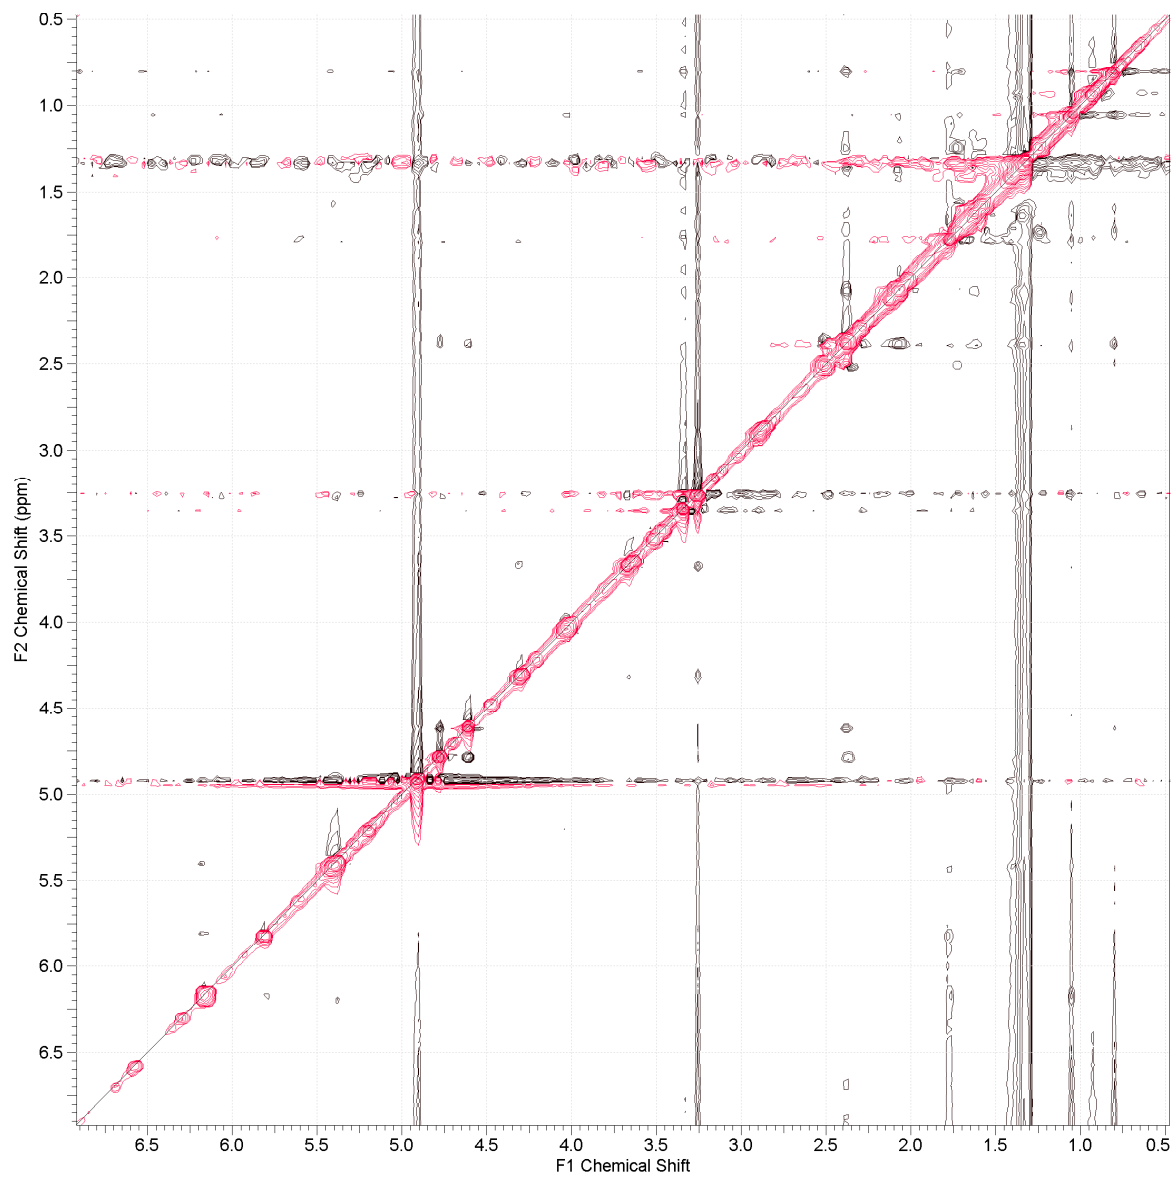

$^1\text{H}$  NMR Spectrum of Clathric Acid Methyl Ester (**1a**) ( $\text{CDCl}_3$ , 500 MHz)

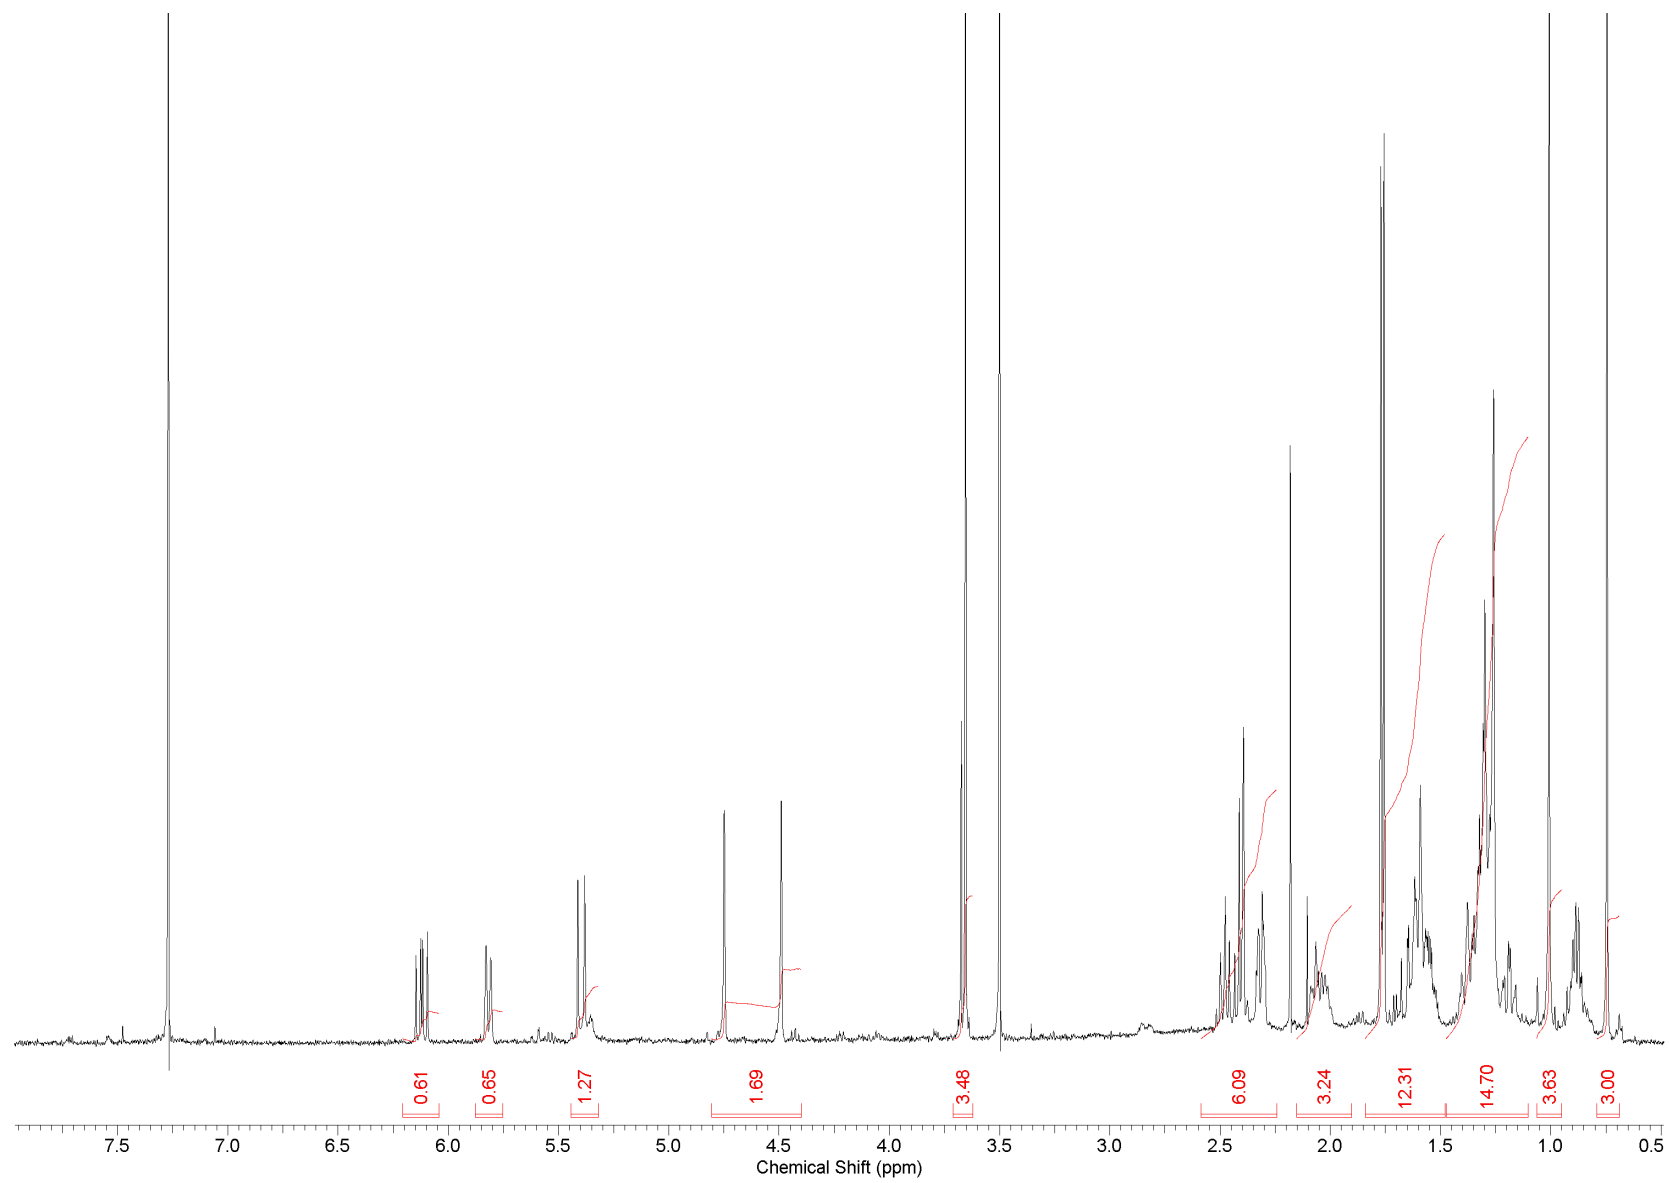



gCOSY NMR Spectrum Clathric Acid Methyl Ester (**1a**) (CDCl<sub>3</sub>, 500 MHz)

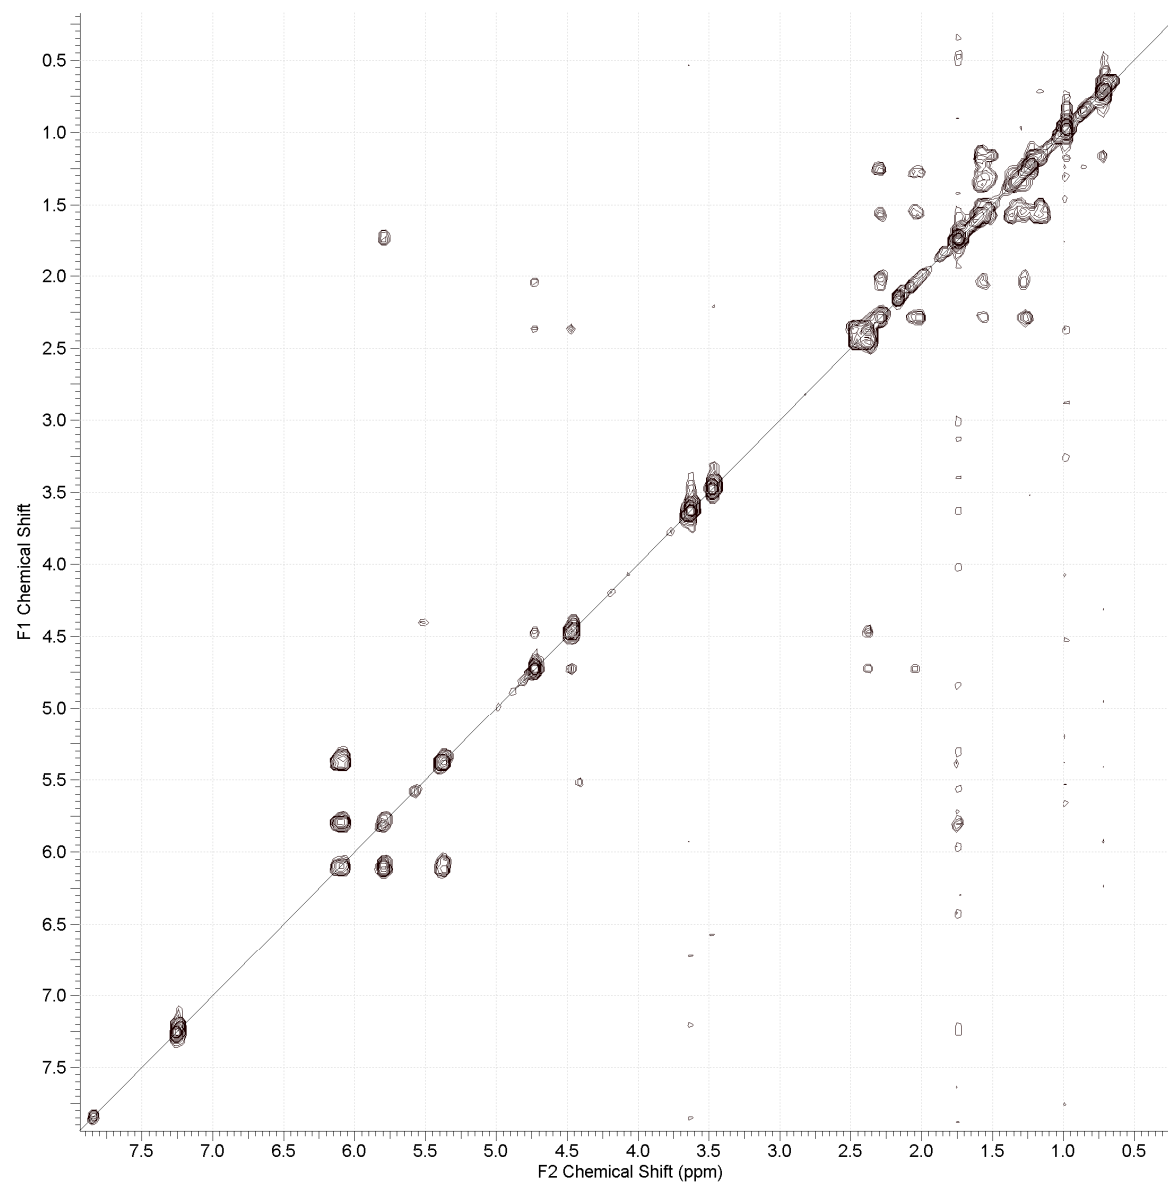

$^1\text{H}$  NMR Spectrum of Clathrimide A (2) ( $\text{CD}_3\text{OD}$ , 400 MHz)

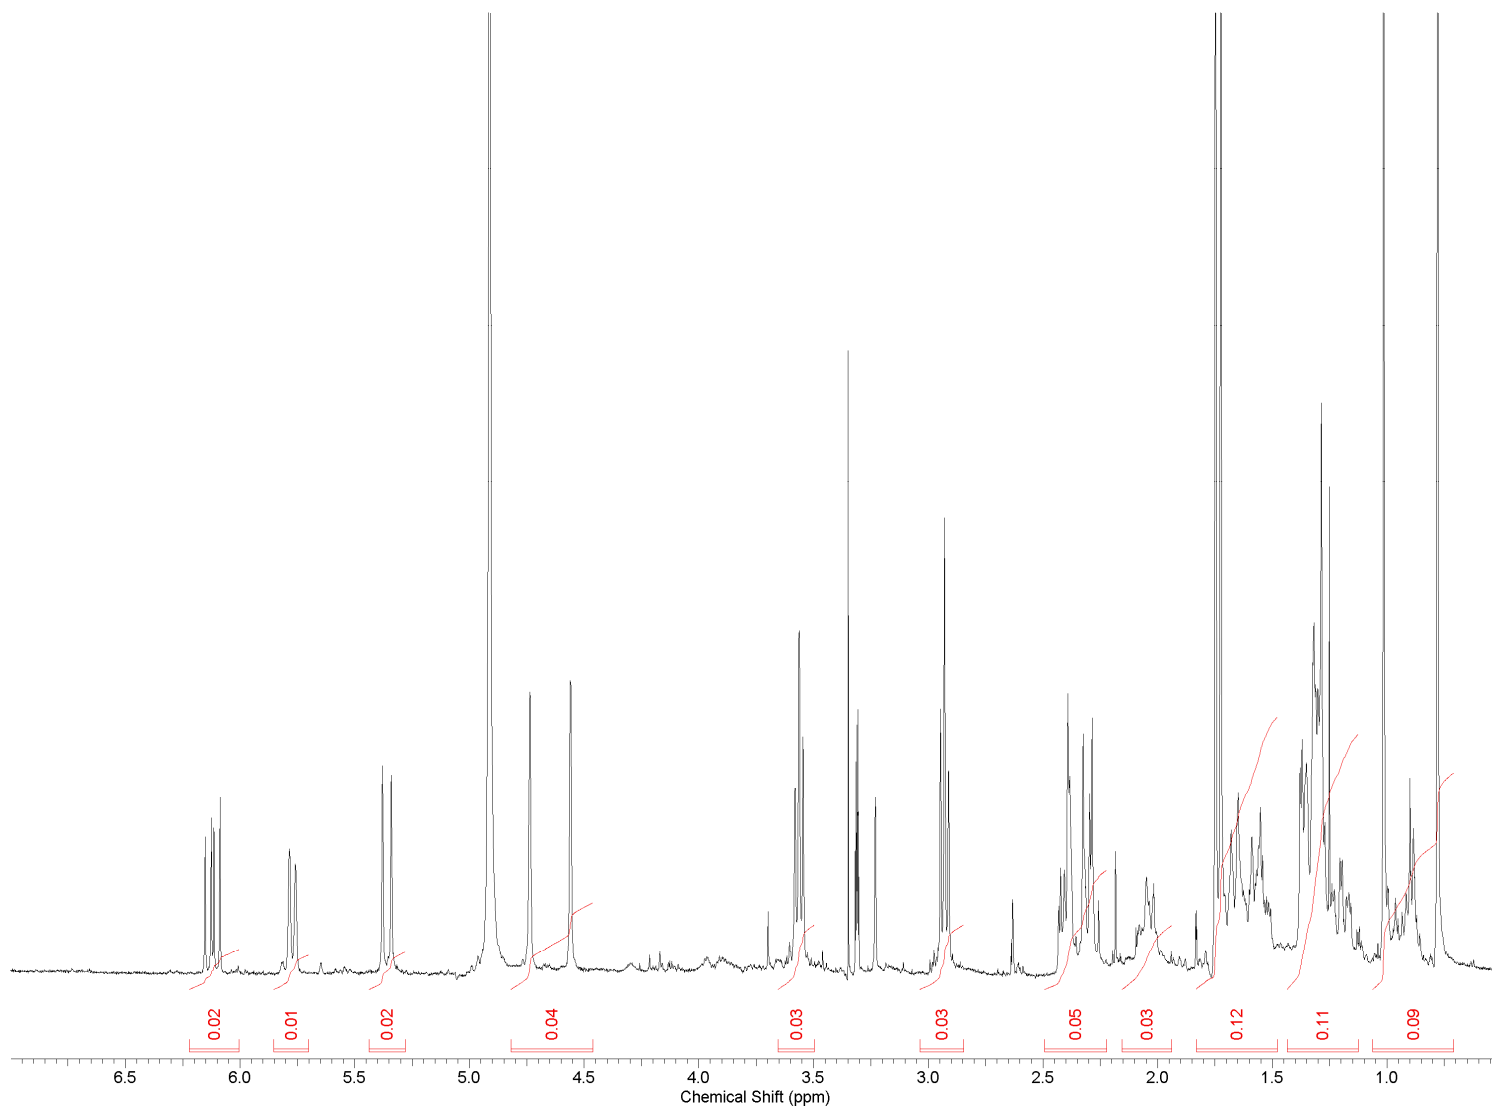

<sup>13</sup>C NMR Spectrum of Clathrimide A (2) (CD<sub>3</sub>OD, 100 MHz)

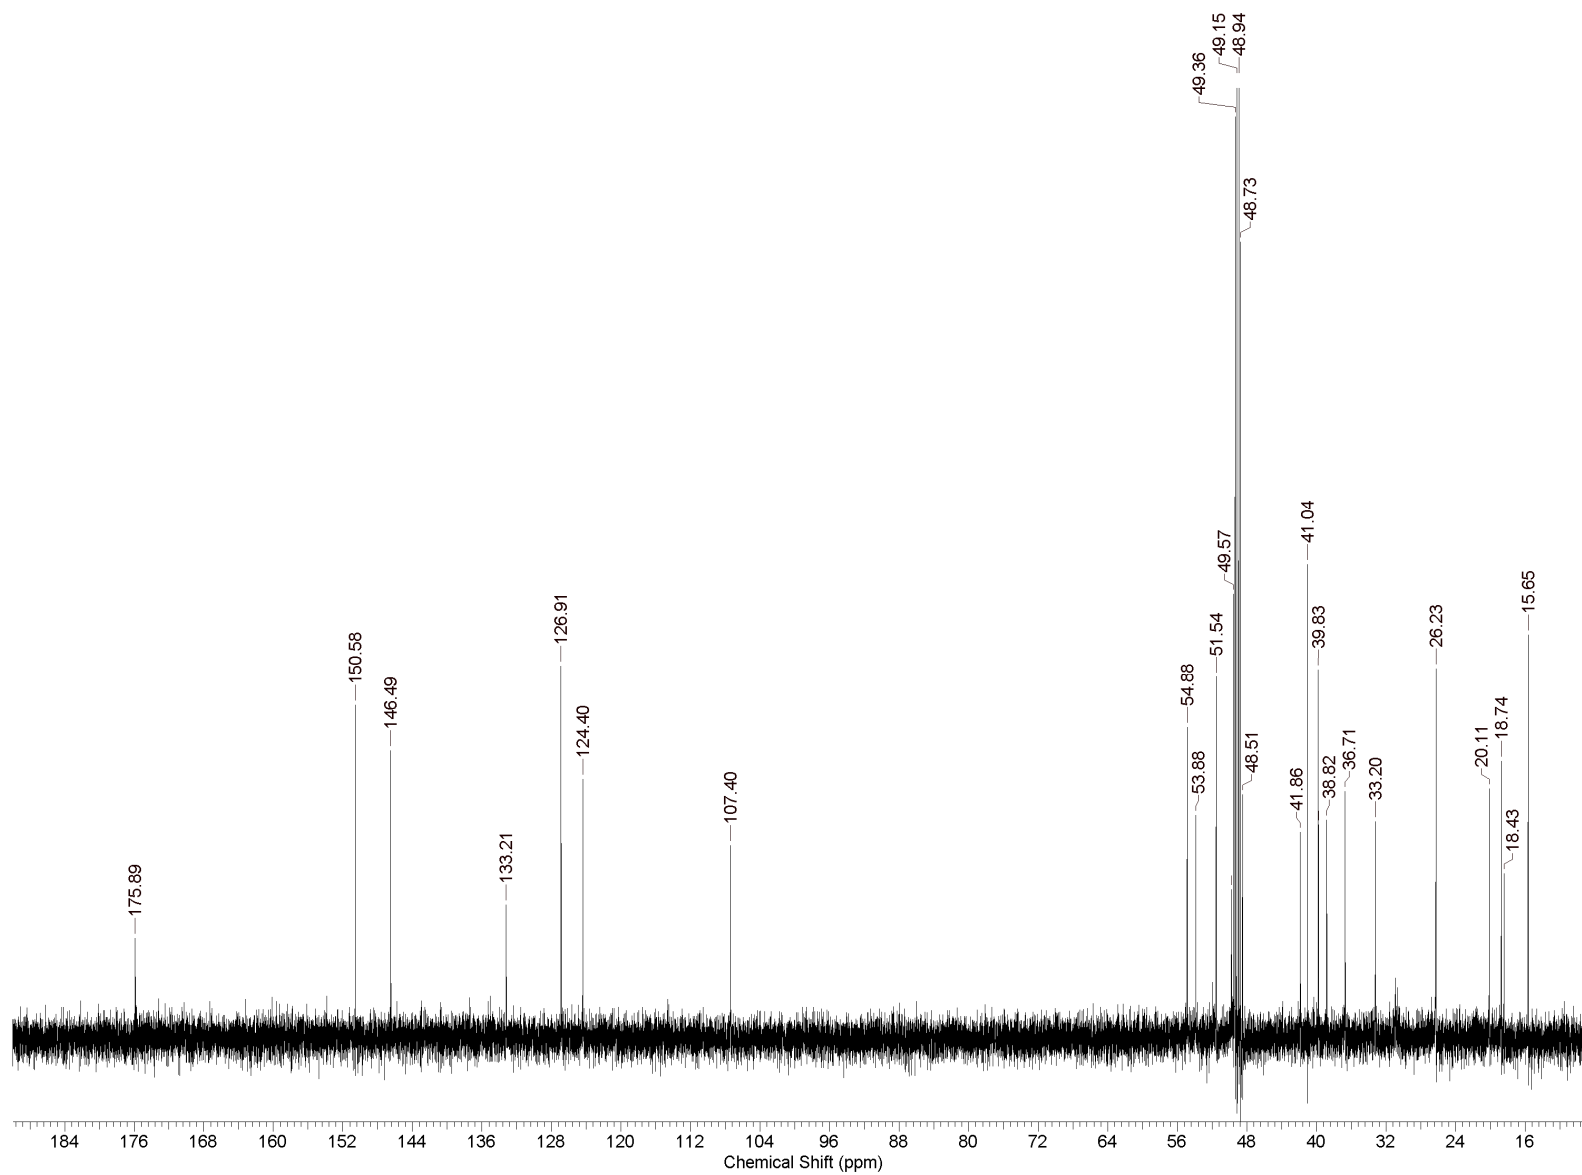

gCOSY NMR Spectrum of Clathrimide A (**2**) (CD<sub>3</sub>OD, 400 MHz)

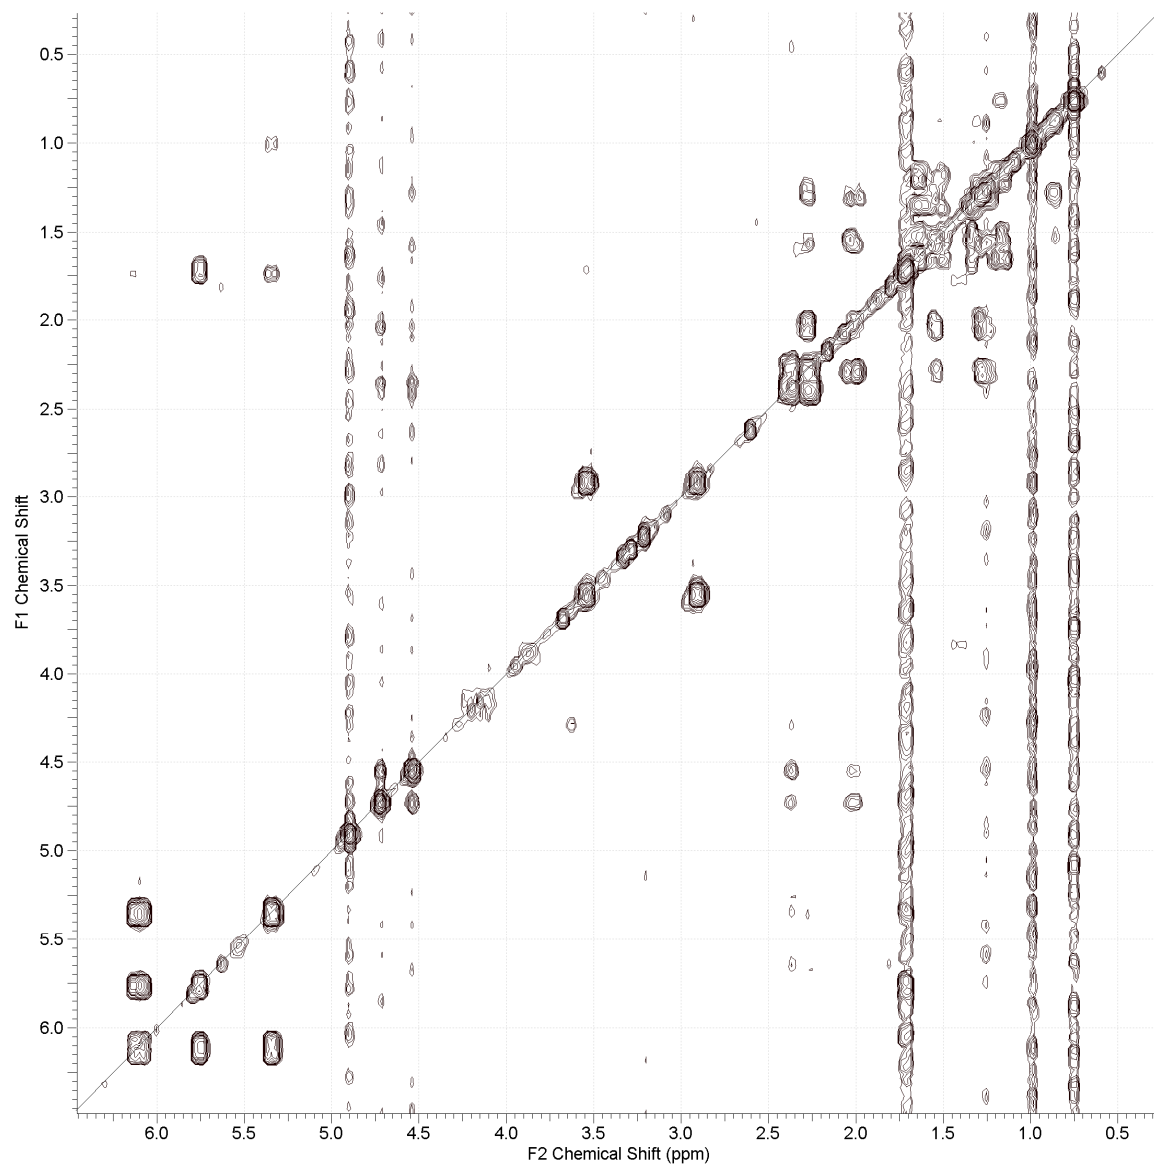

gHSQC NMR Spectrum of Clathrimide A (**2**) (CD<sub>3</sub>OD, 400 MHz)

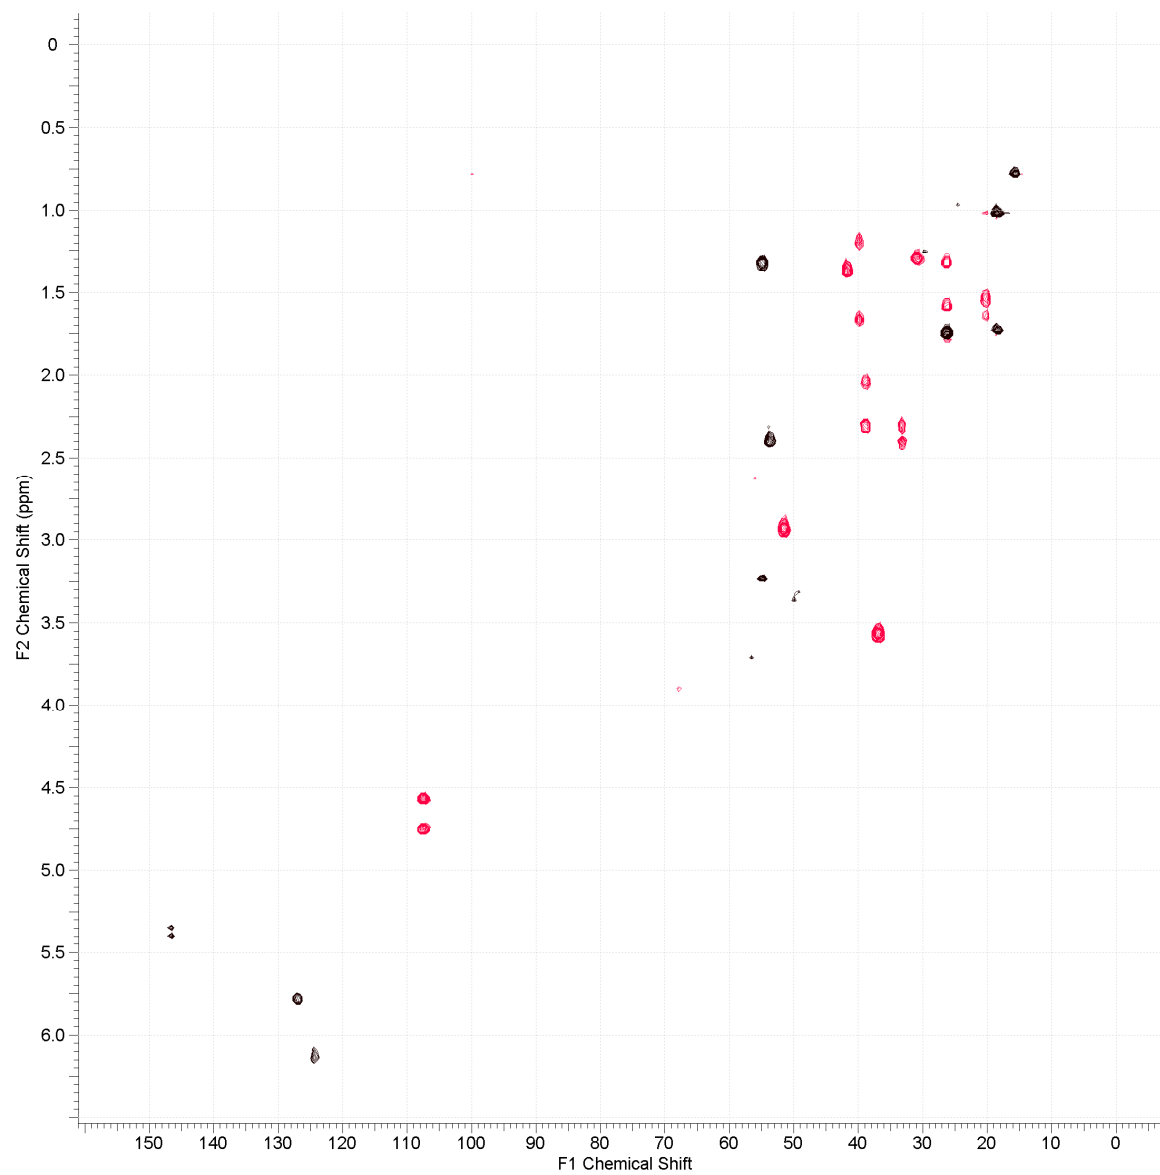

gHMBC NMR Spectrum of Clathrimide A (2) (CD<sub>3</sub>OD, 400 MHz)

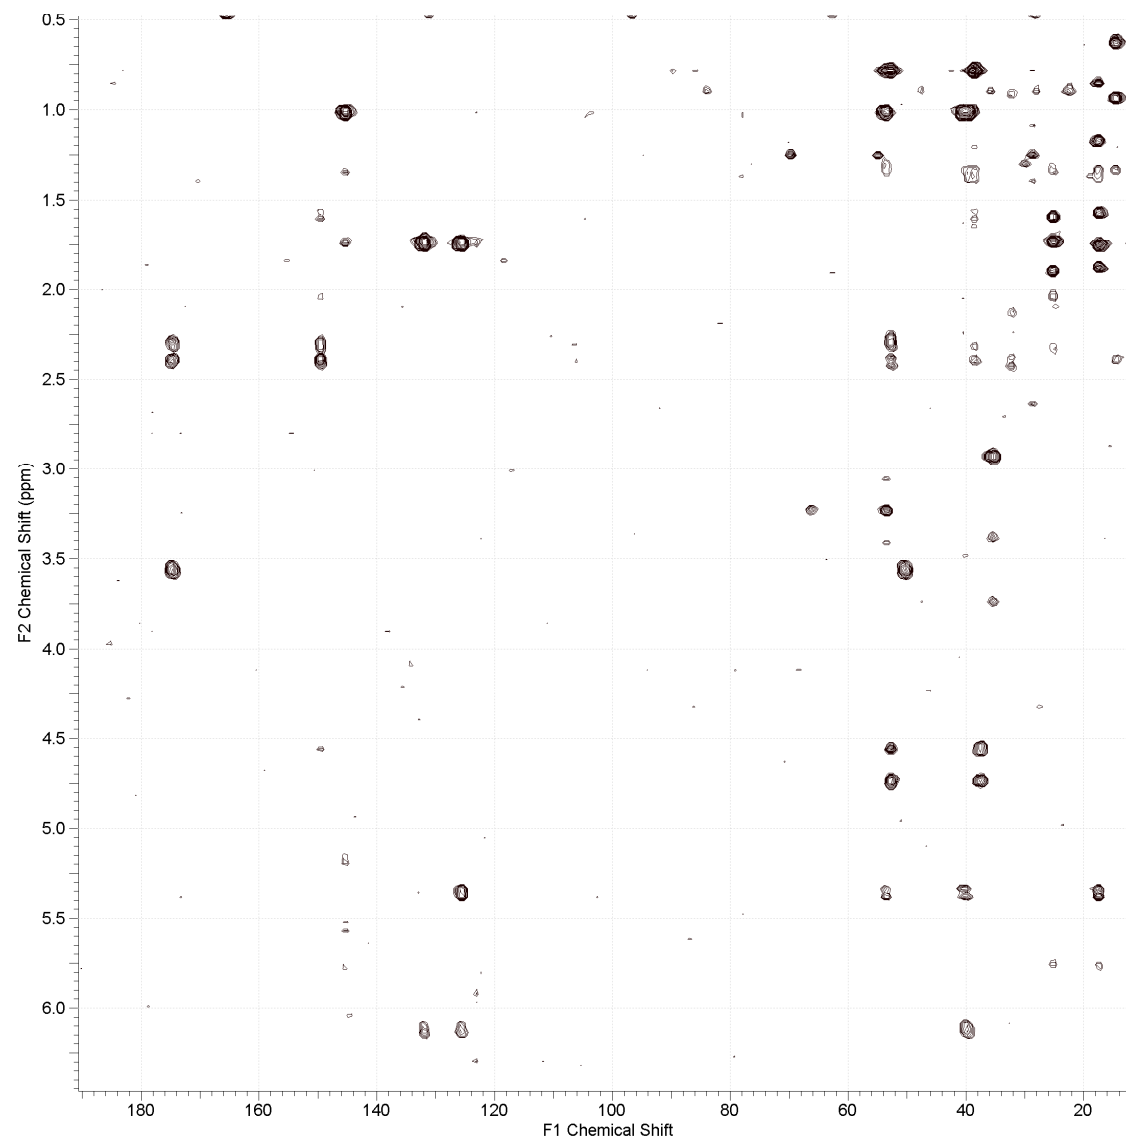

ROESY NMR Spectrum of Clathrimide A (2) (CD<sub>3</sub>OD, 400 MHz)

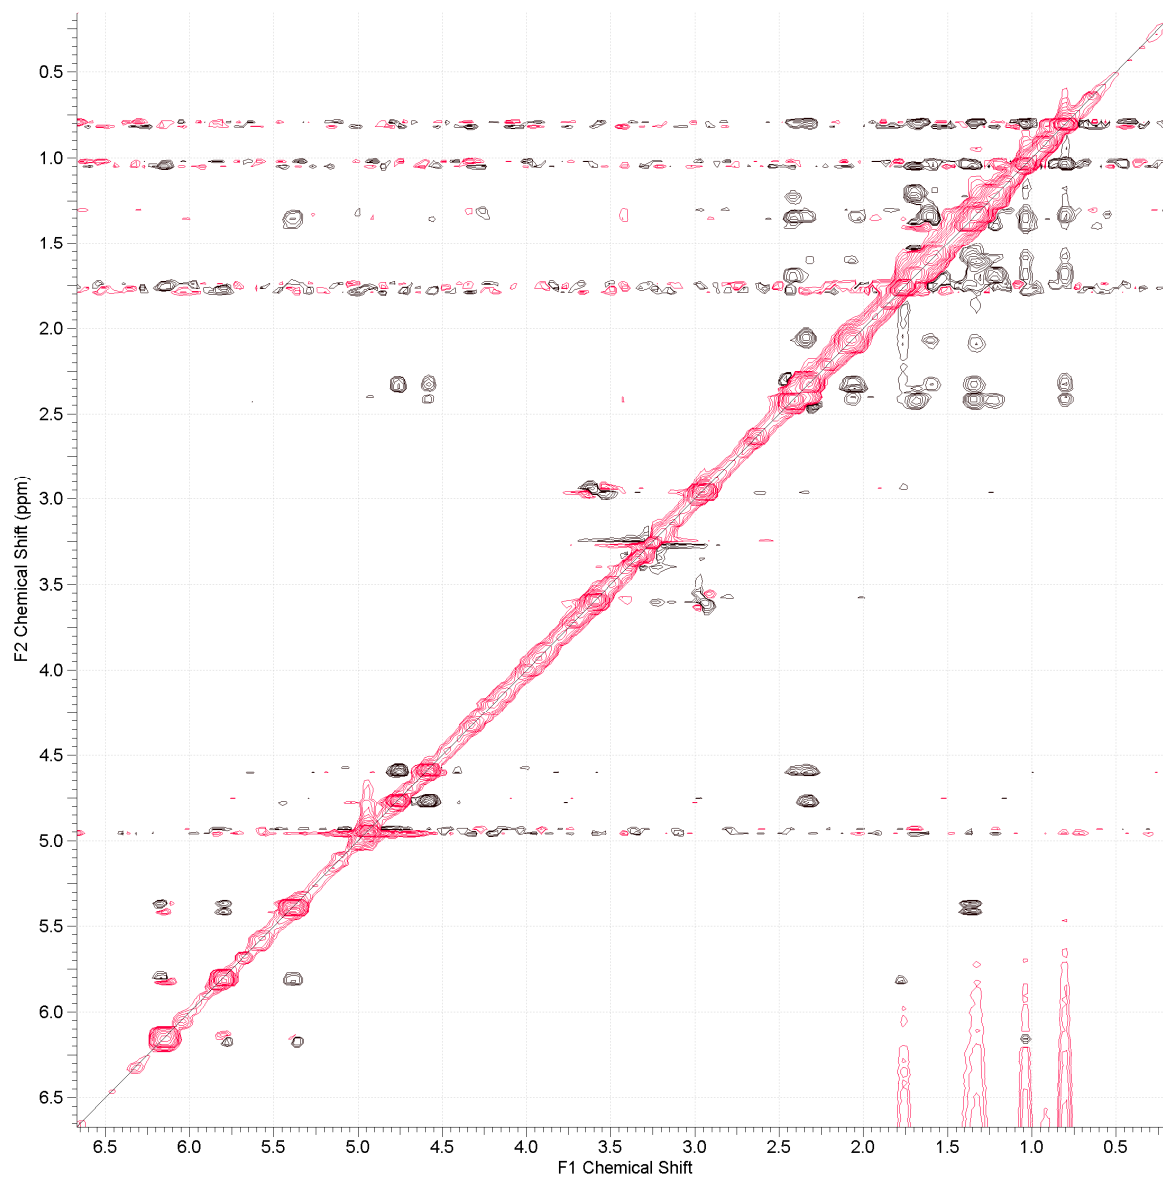

$^1\text{H}$  NMR Spectrum of Clathrimide B (**3**) ( $\text{CD}_3\text{OD}$ , 400 MHz)

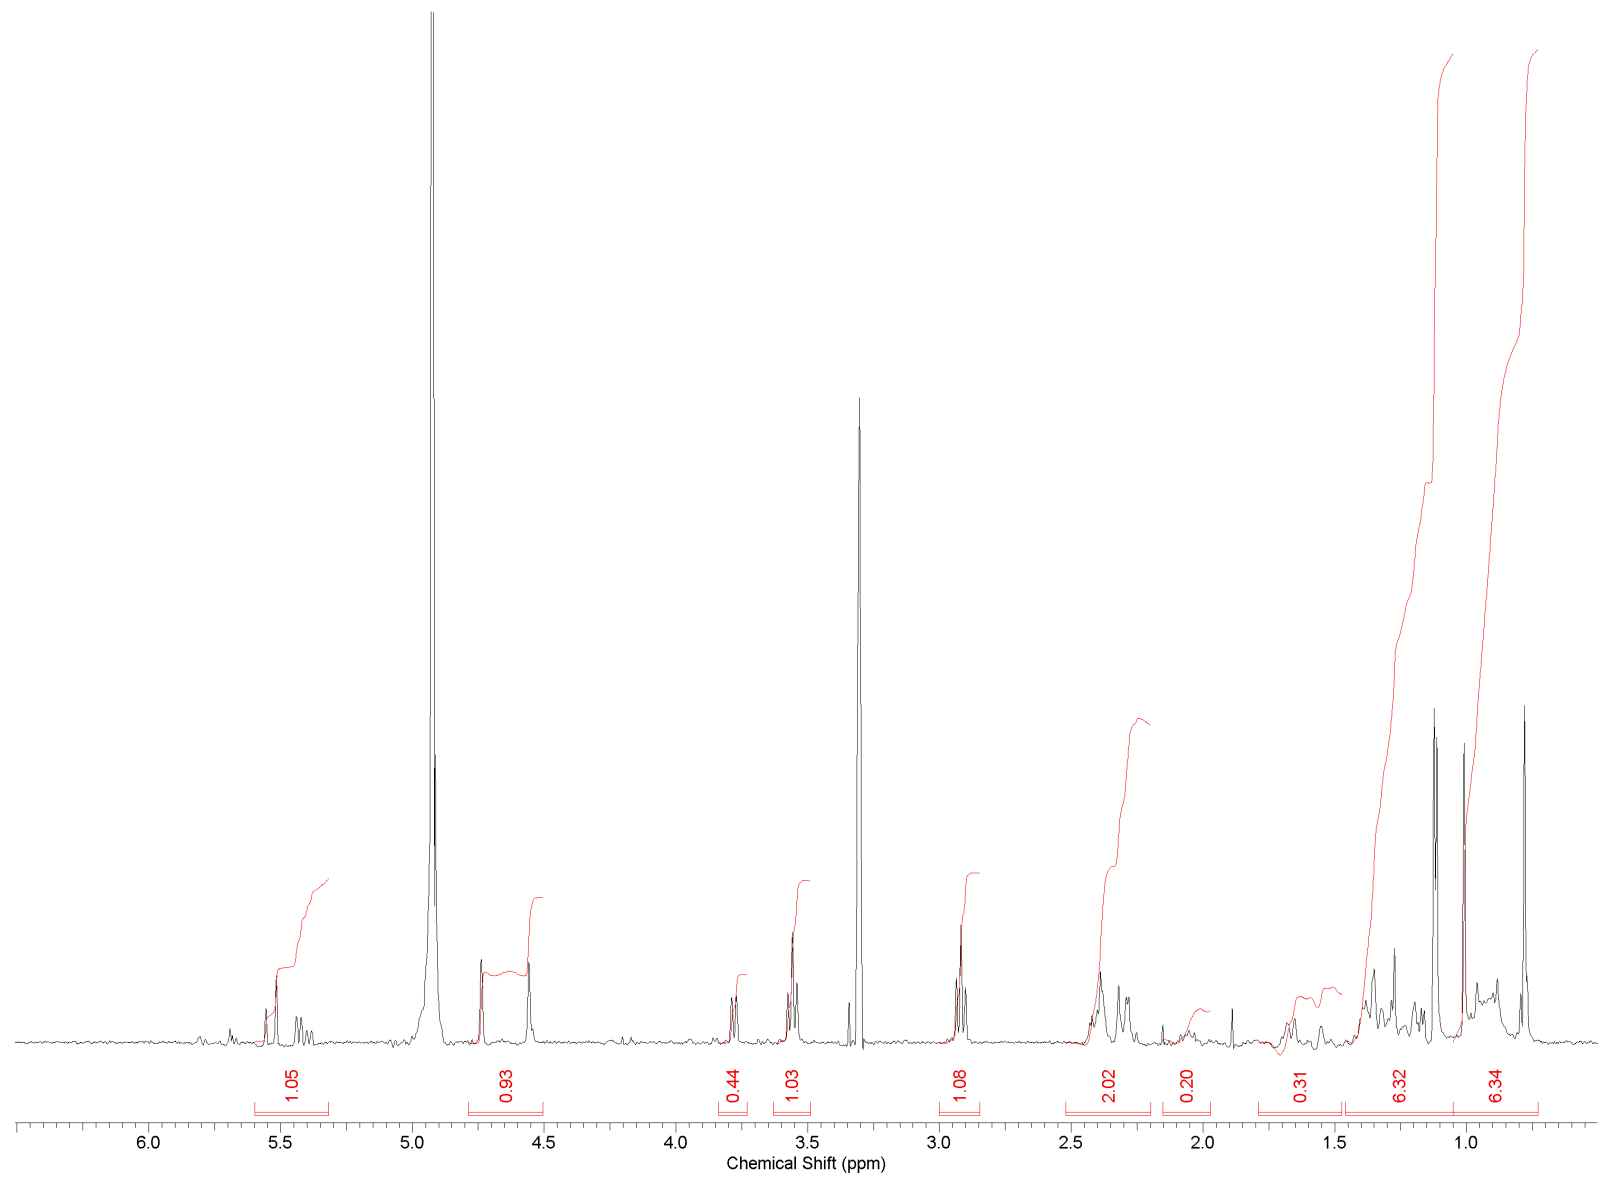



<sup>13</sup>C NMR Spectrum of Clathrimide B (**3**) (CD<sub>3</sub>OD, 100 MHz)

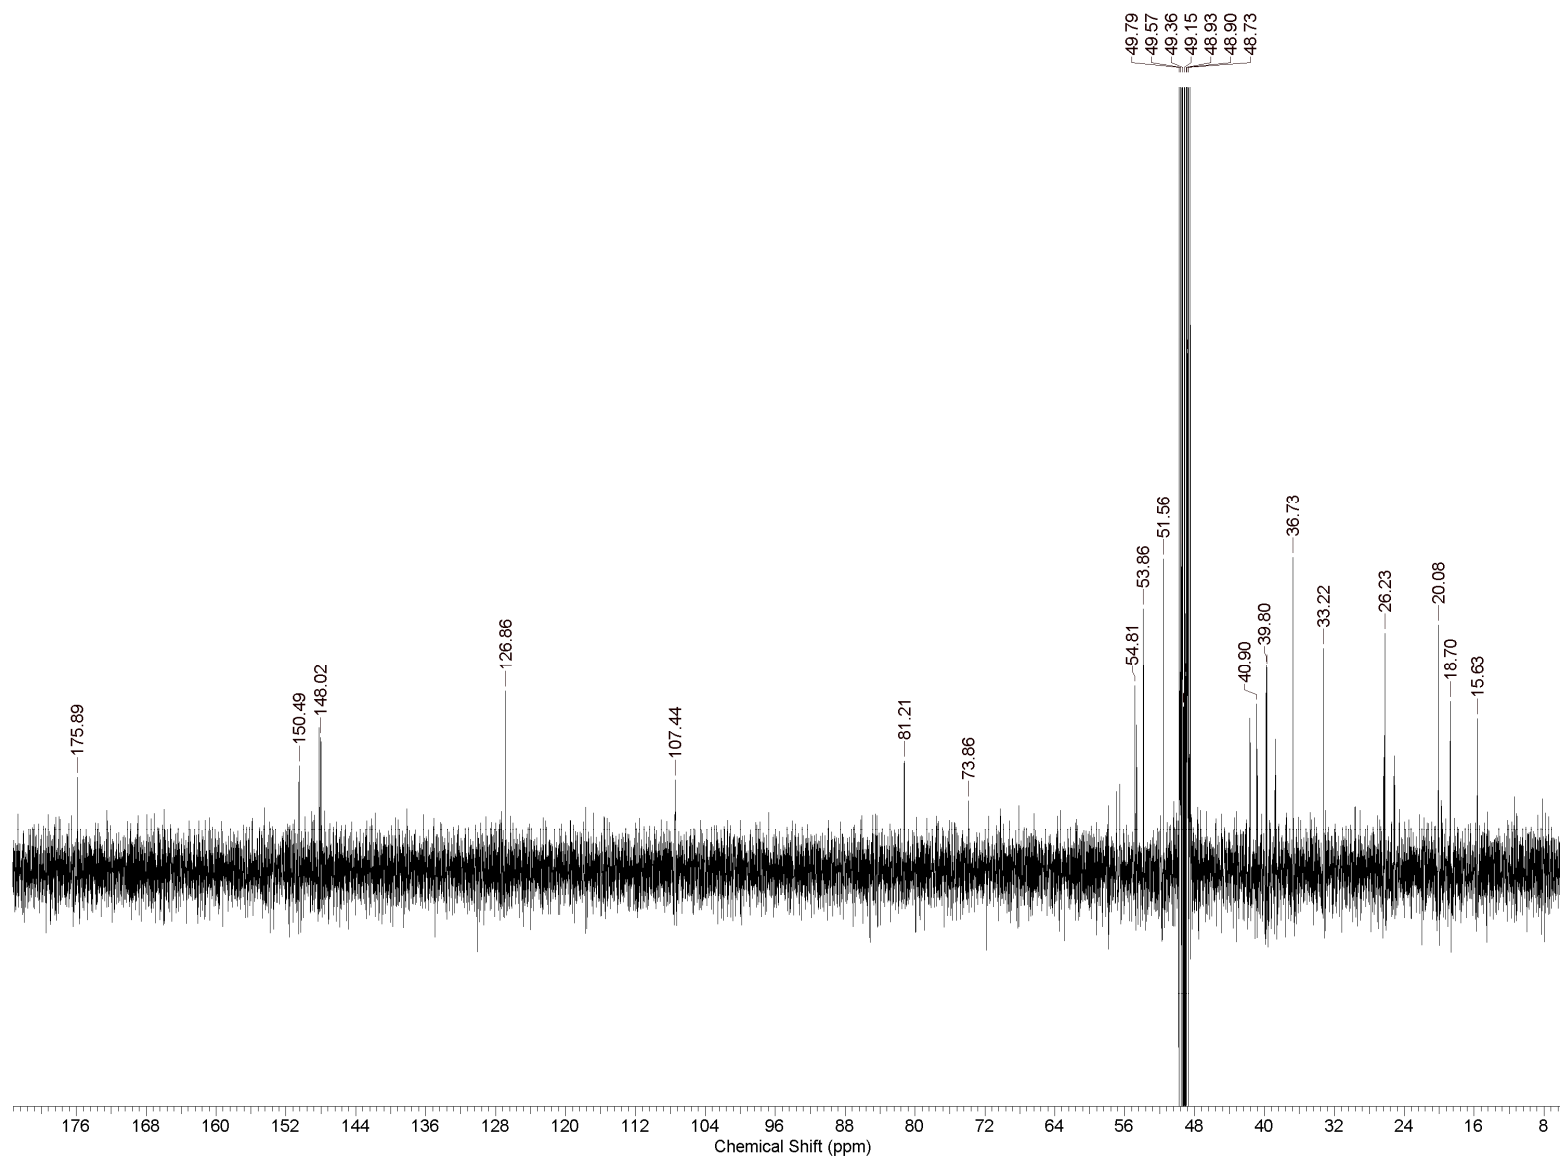

gCOSY NMR Spectrum of Clathrimide B (**3**) (CD<sub>3</sub>OD, 400 MHz)

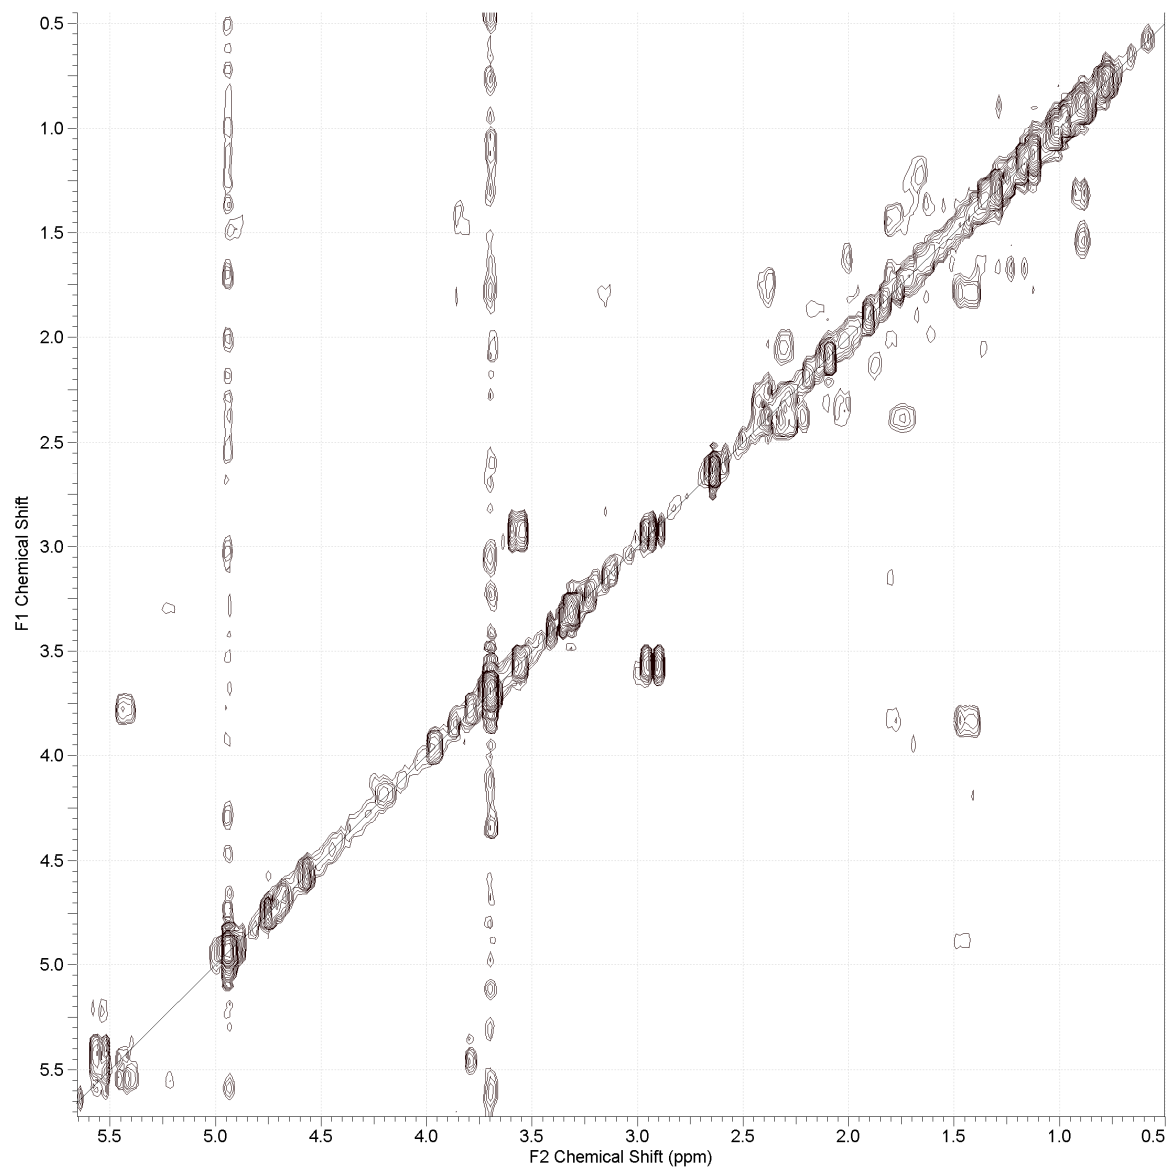

gHMBC NMR Spectrum of Clathrimide B (3) (CD<sub>3</sub>OD, 400 MHz)

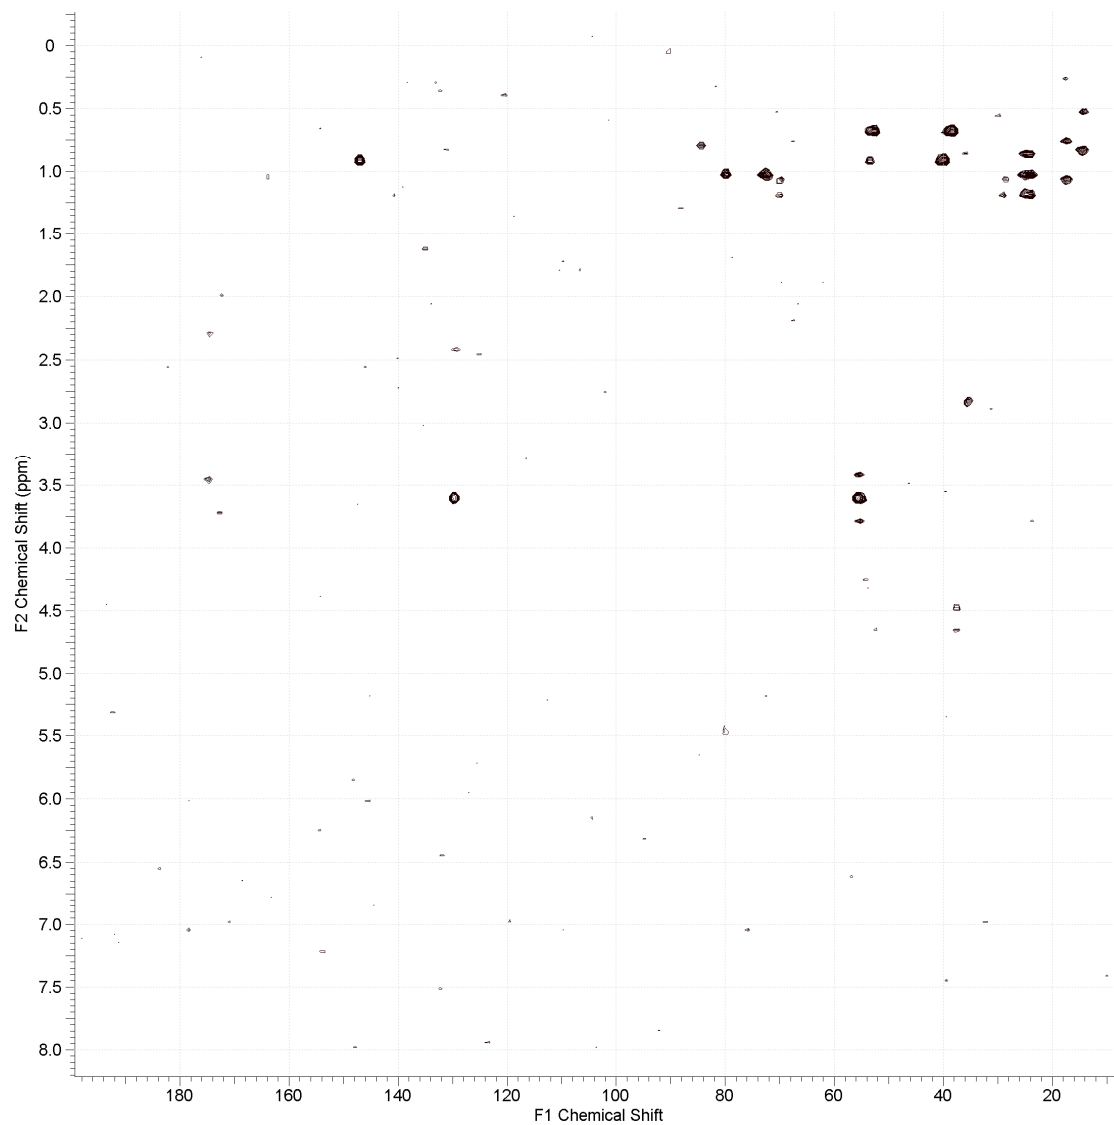

ROESY NMR Spectrum of Clathrimide B (**3**) (CD<sub>3</sub>OD, 500 MHz)

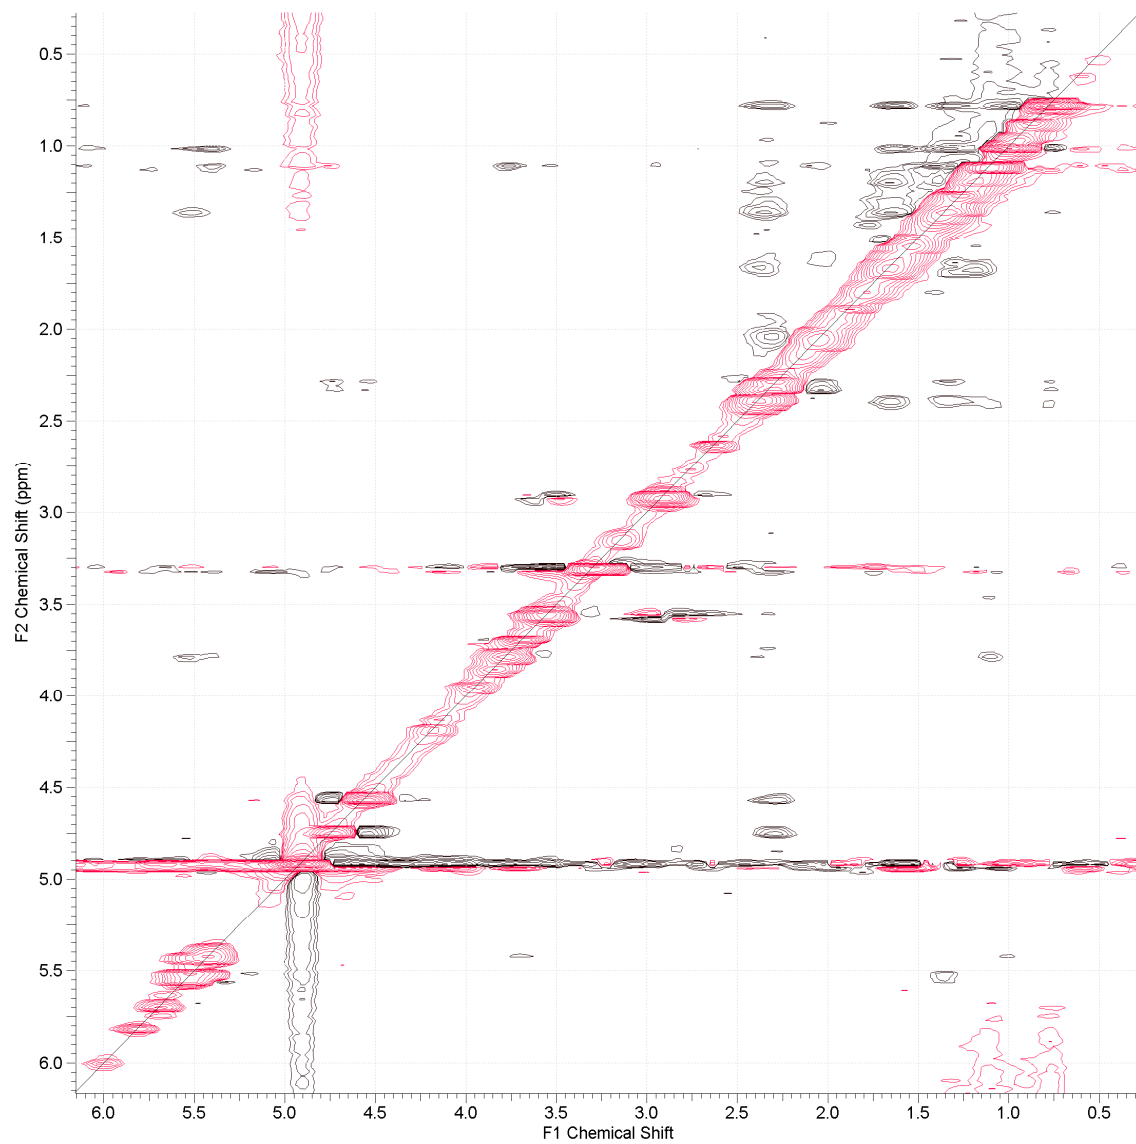

Supplement: NIHMS379031-supplement-1_si_001.pdf [file NIHMS379031-supplement-1_si_001.pdf]
